# Supplementary material
Source: PubMed Central journal article supplement (PMC3905952)
Supplement: NIHMS462495-supplement-1.pdf [file NIHMS462495-supplement-1.pdf]

## People with HIV/AIDS

### All cancers

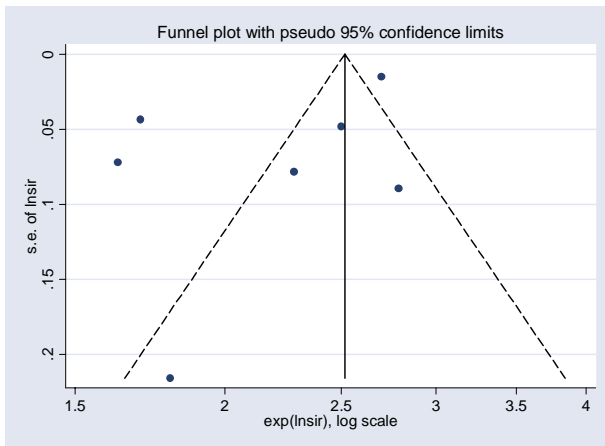

### Lip

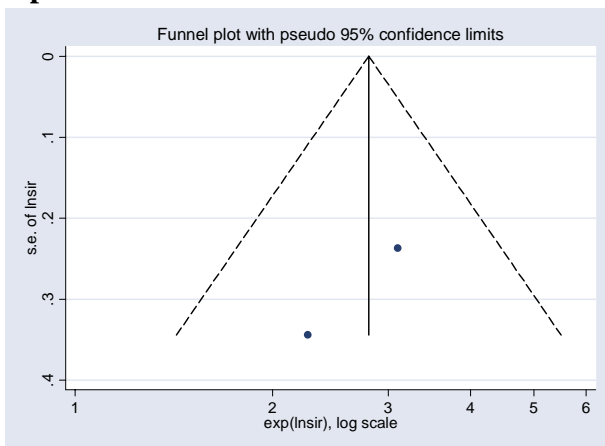

### Tongue

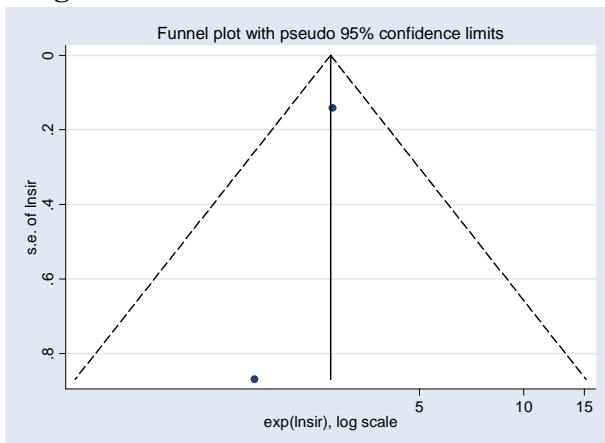

## Mouth

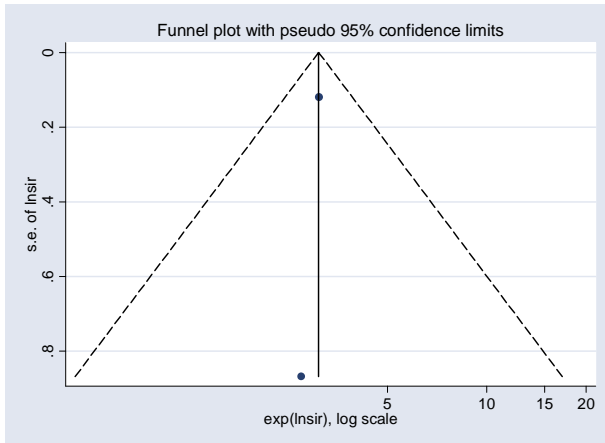

## Salivary gland

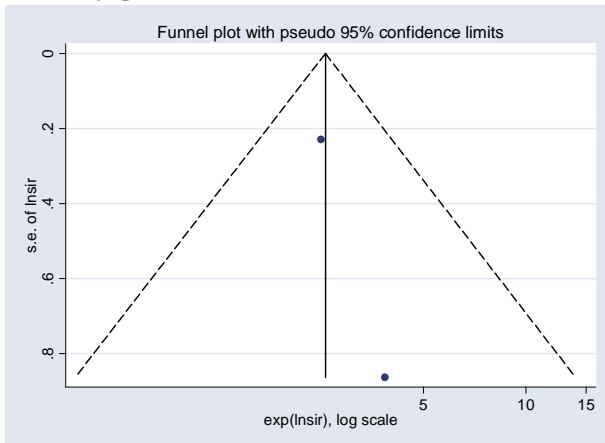

## Oral cavity and pharynx (does not include lip or nasopharynx)

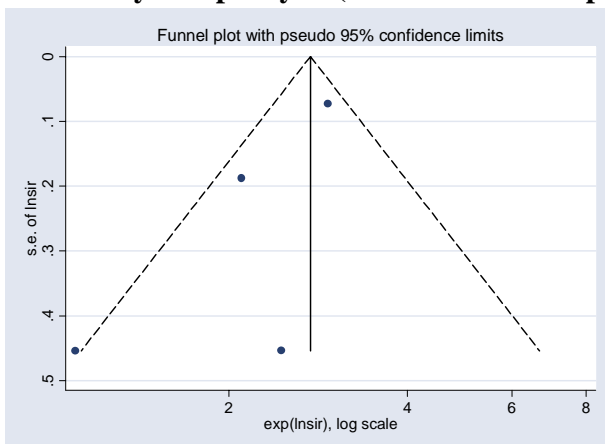

## Lip, mouth, and pharynx

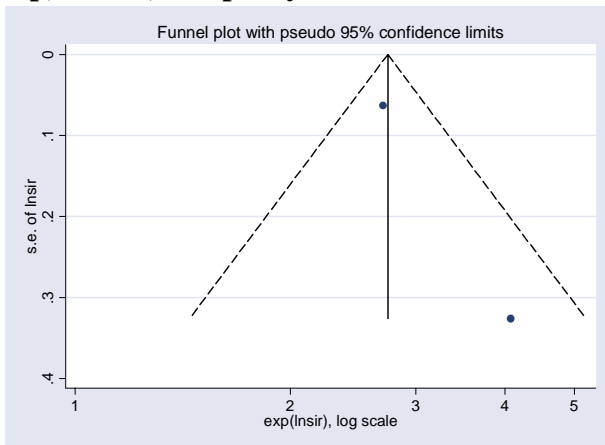

## Nasopharynx

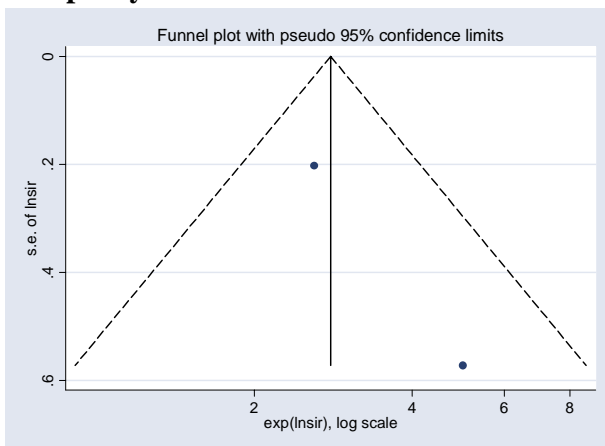

## Oesophagus

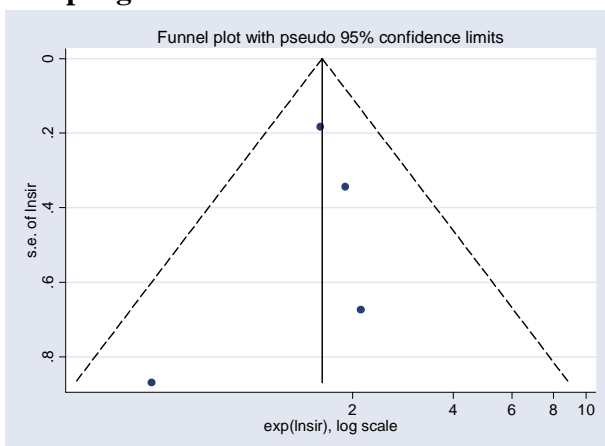

## Stomach

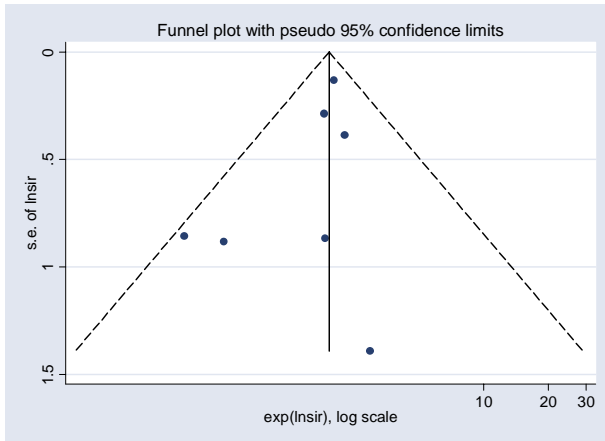

## Small intestine

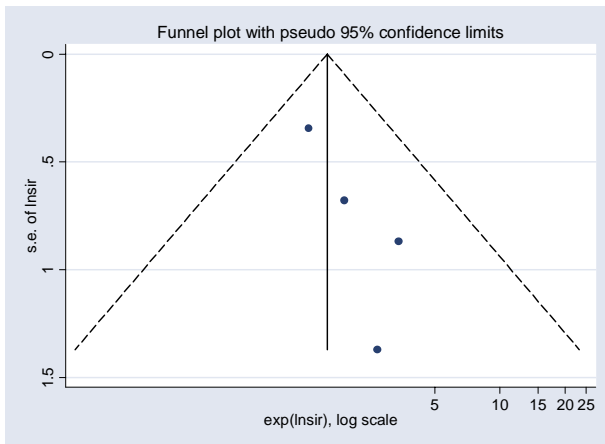

## Colon

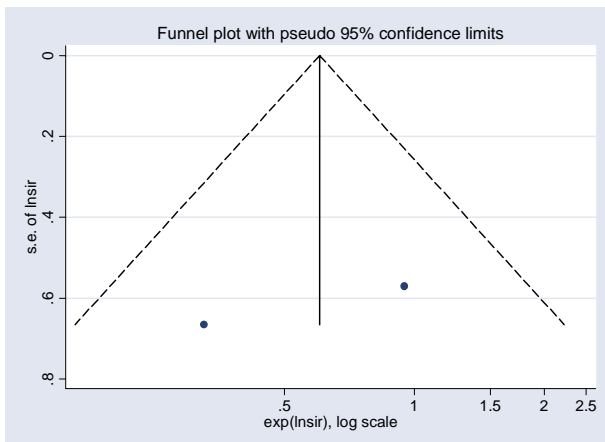

## Rectum

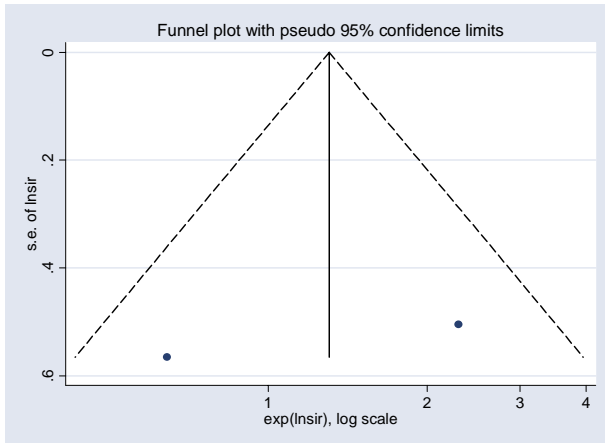

## Colon and rectum

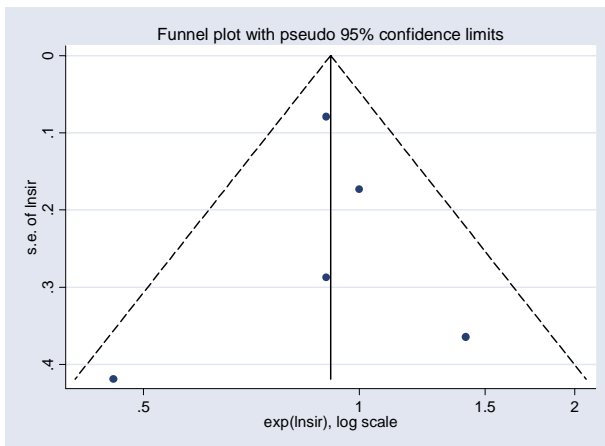

## Anus

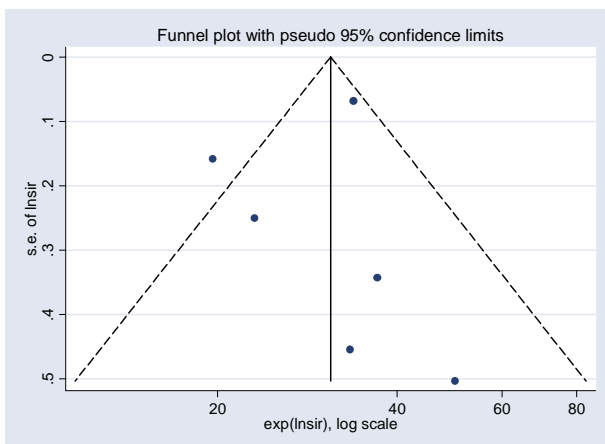



### Trachea, bronchus, and lung

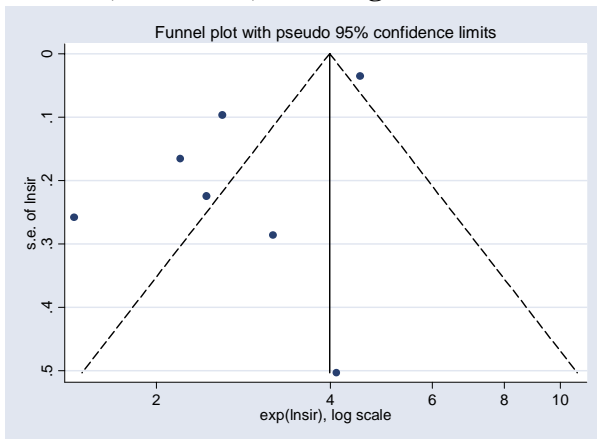

### Melanoma

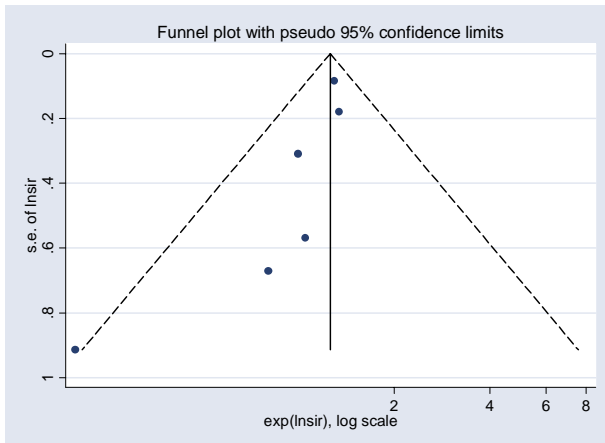

### Non-melanoma—skin

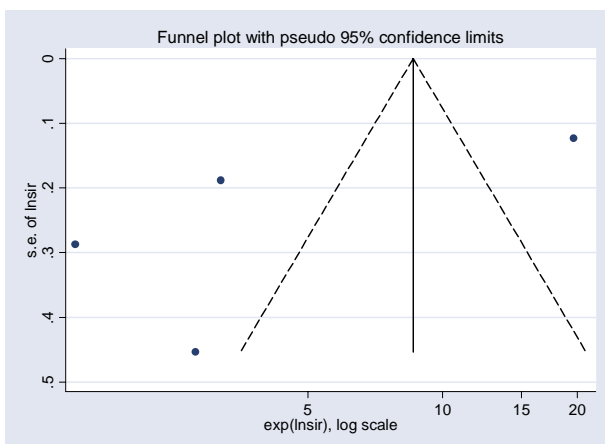

## Connective and other soft tissue

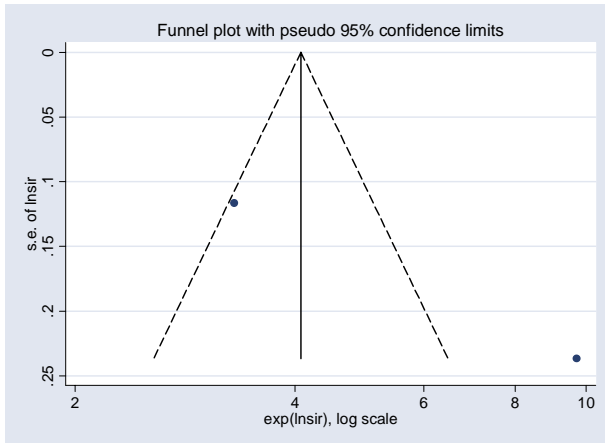

## Breast

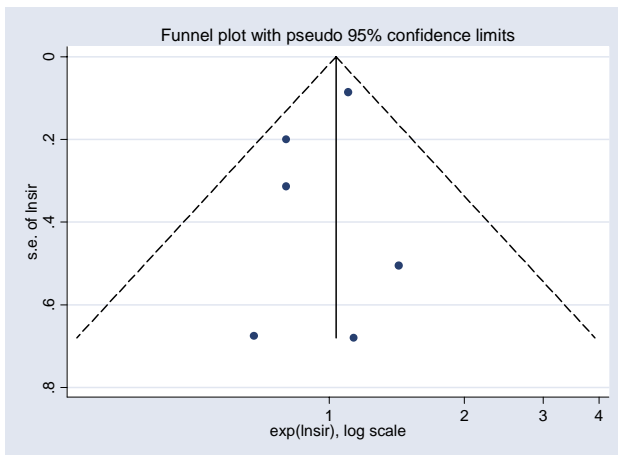

## Vulva/vagina

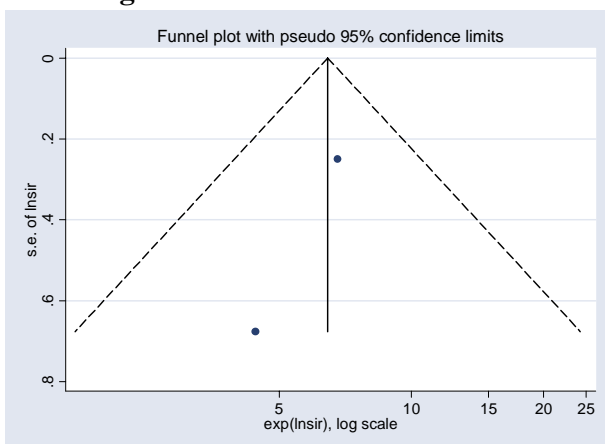



## Cervix uteri

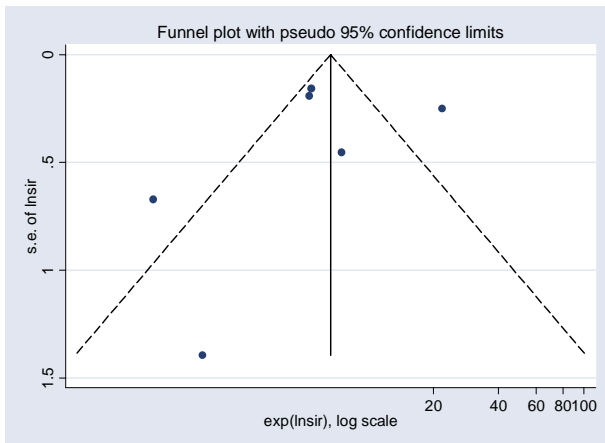

## Corpus uteri

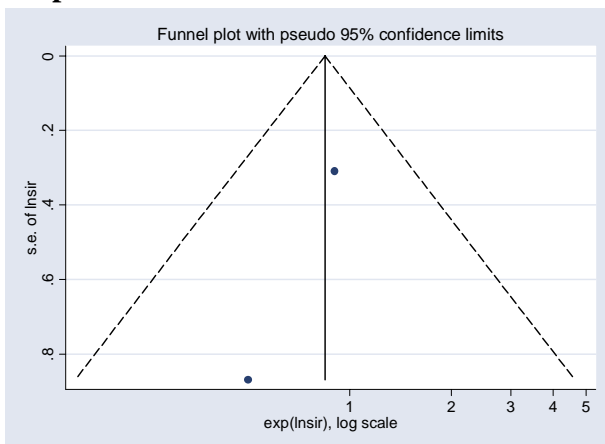

## Ovary

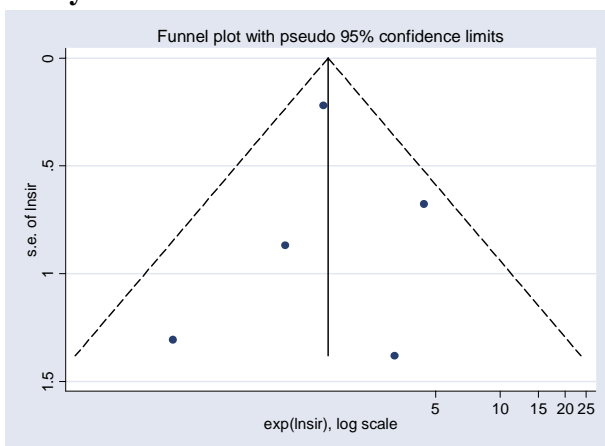

## Penis

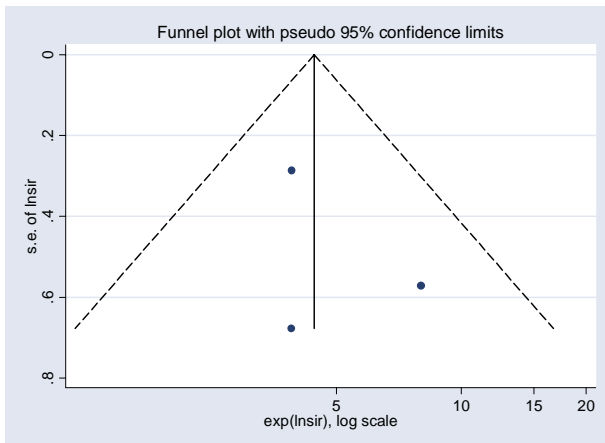

## Prostate

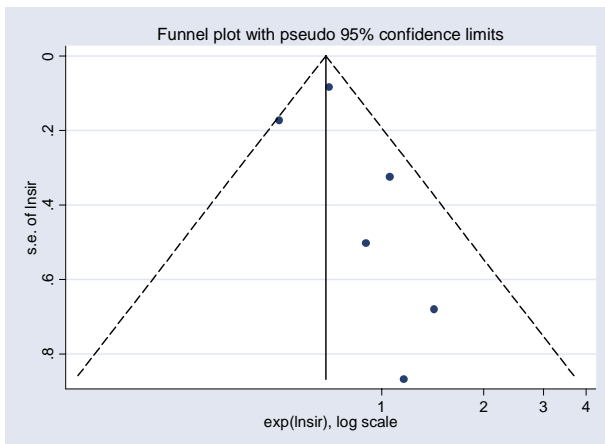

## Testis

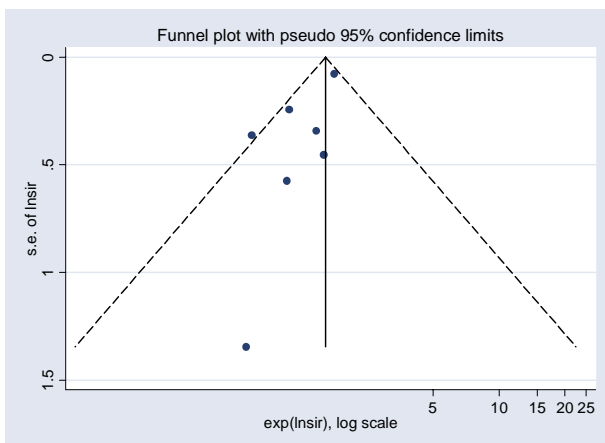

## Kidney

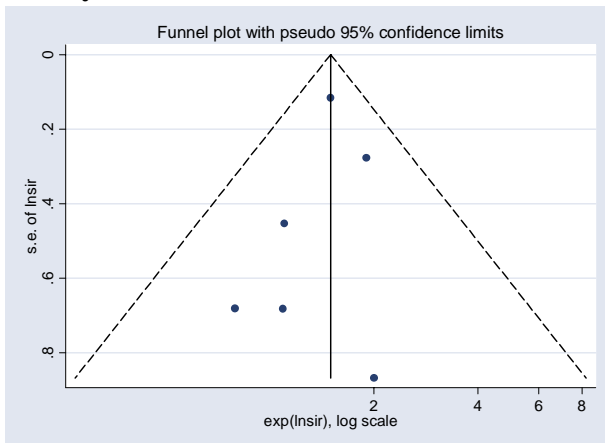

## Bladder

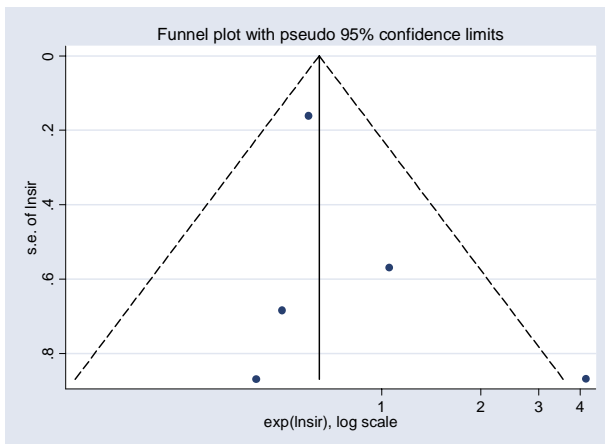

## Eye

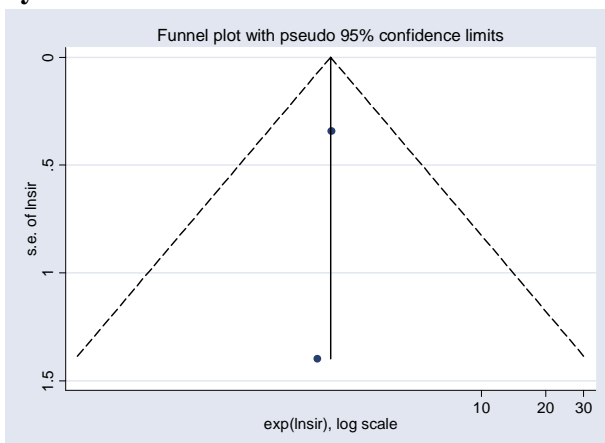

## Brain

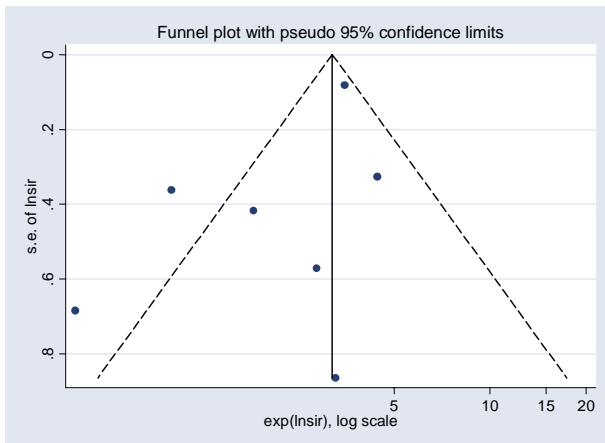

## Thyroid

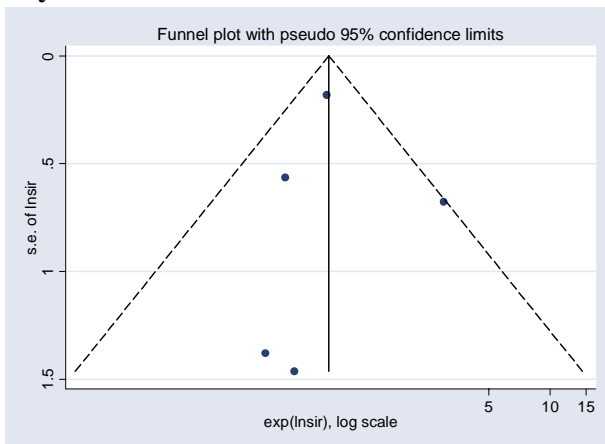

## Hodgkin's lymphoma

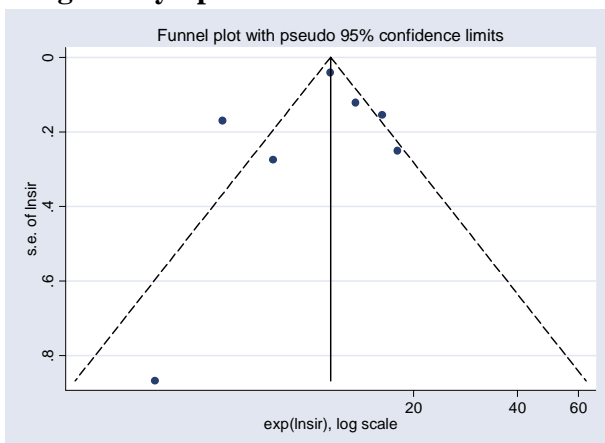

## Non-Hodgkin's lymphoma

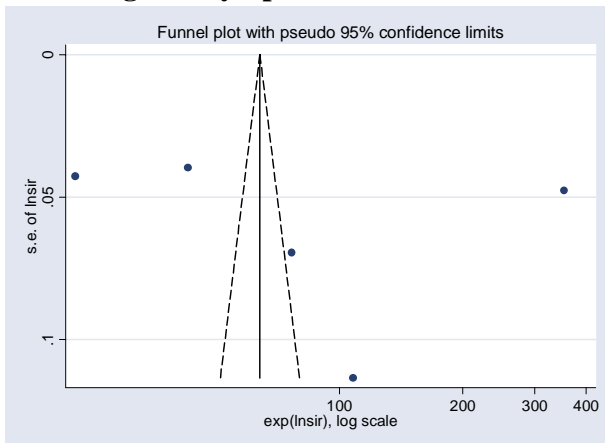

## Multiple myeloma

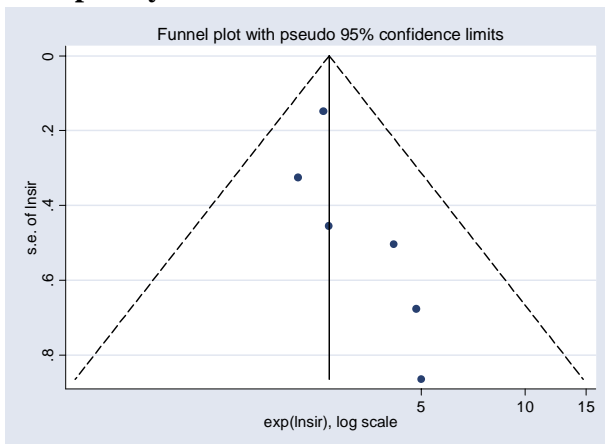

## Leukaemia

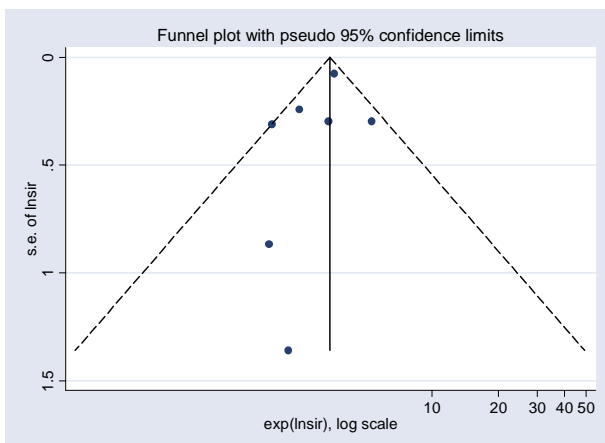

## Transplant recipients

### All non-AIDS defining cancers

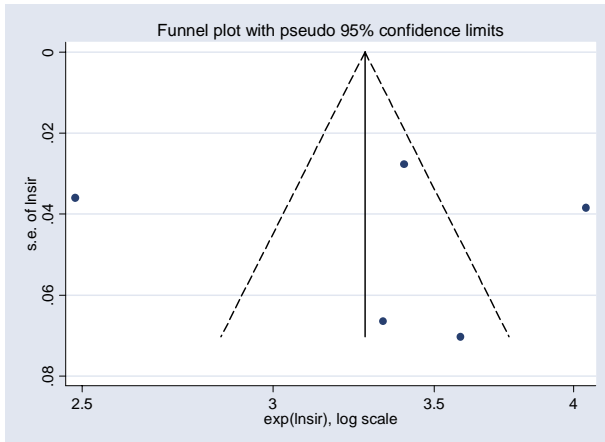

## Lip

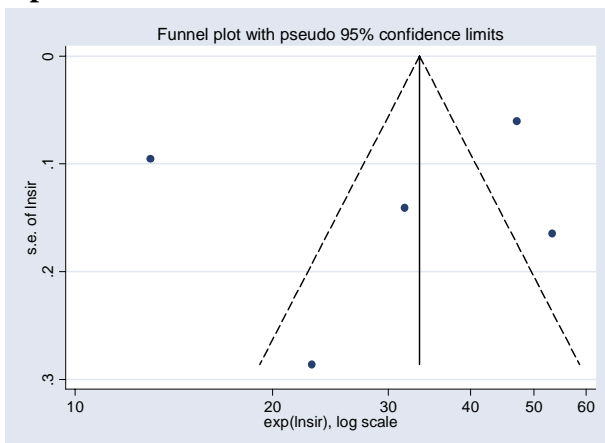

## Mouth

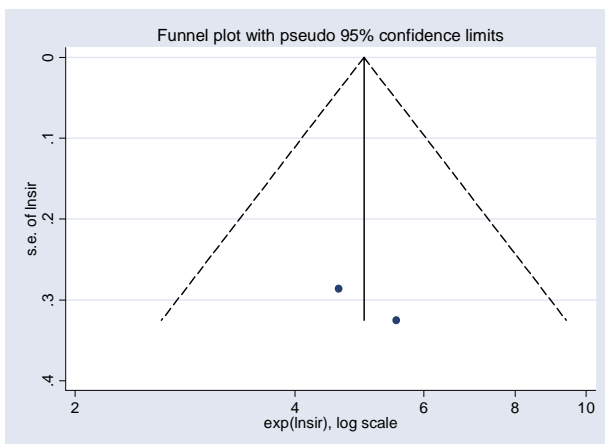

### Oral cavity and pharynx

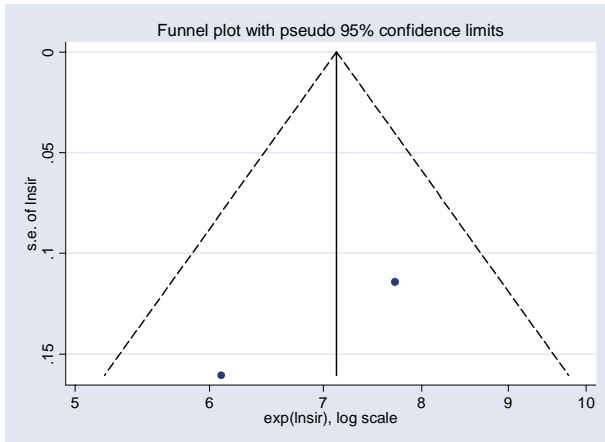

### Oral cavity and pharynx (does not include lip or nasopharynx)

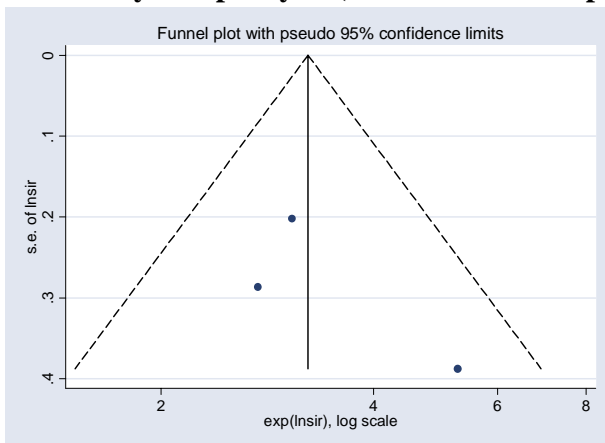

### Lip, mouth, and pharynx

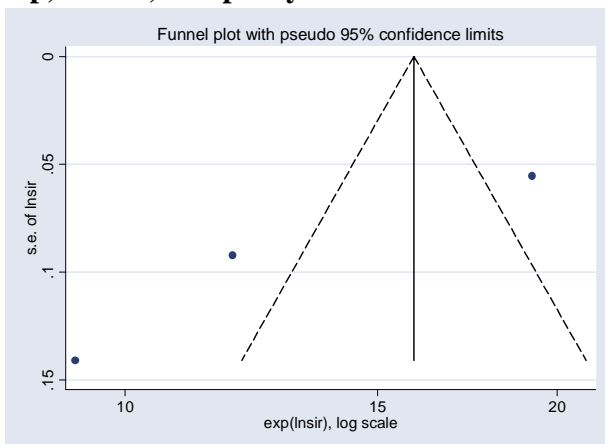

## Oesophagus

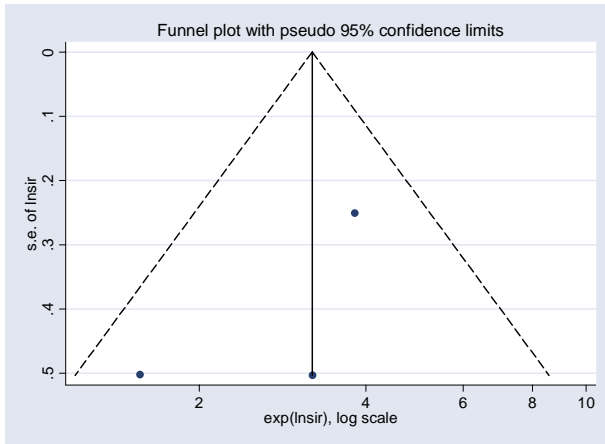

## Stomach

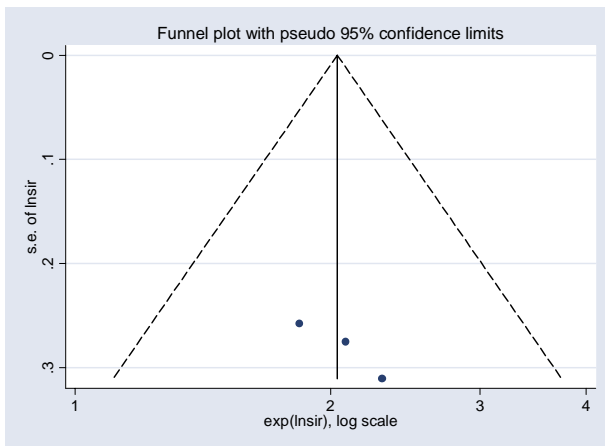

## Small intestine



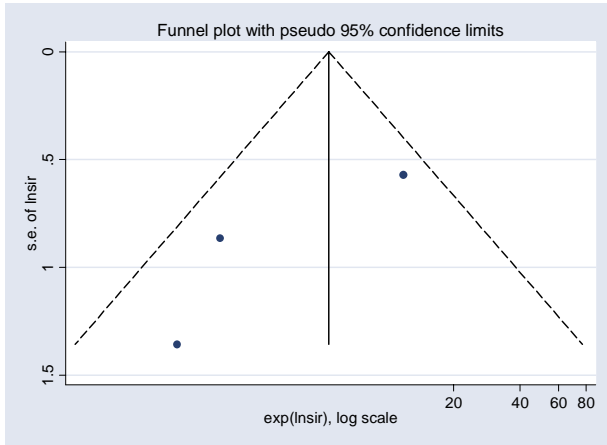

## Colon

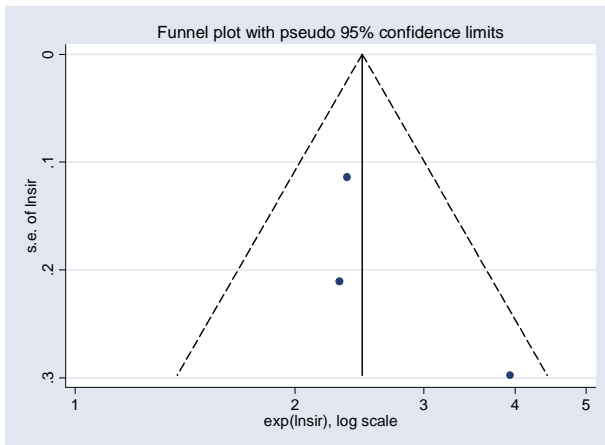

## Rectum

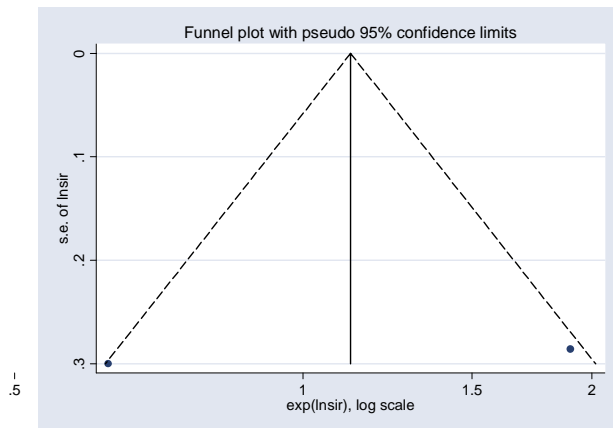

## Colon and rectum

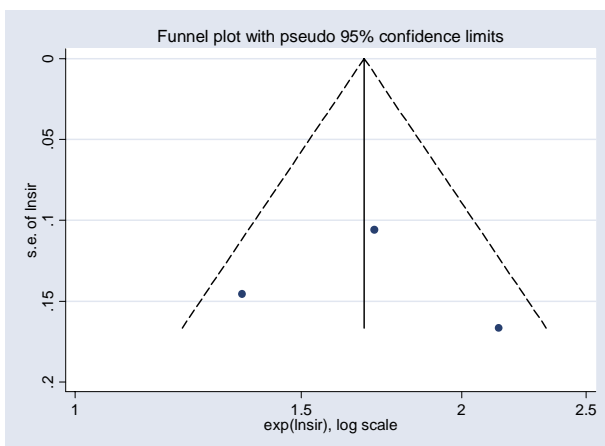

## Anus

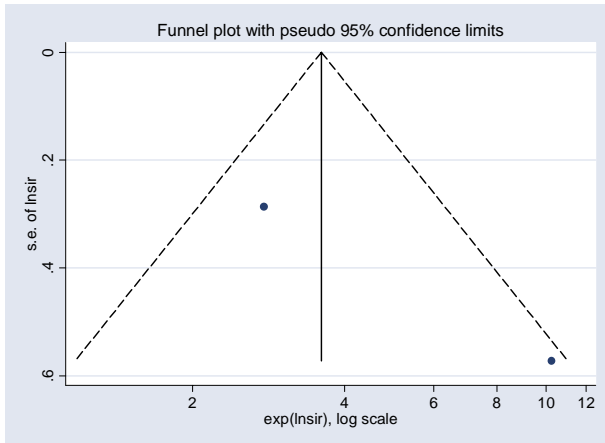

## Liver

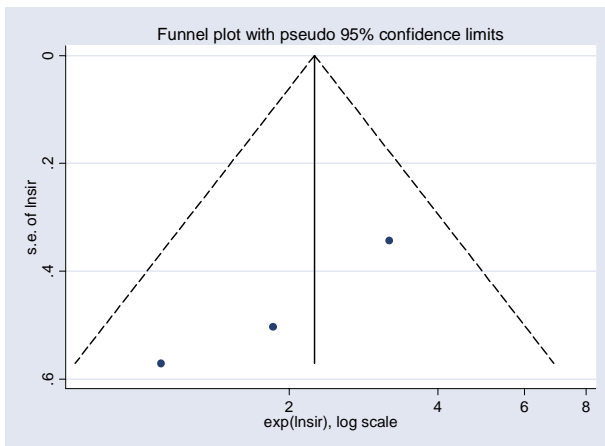

## Gallbladder

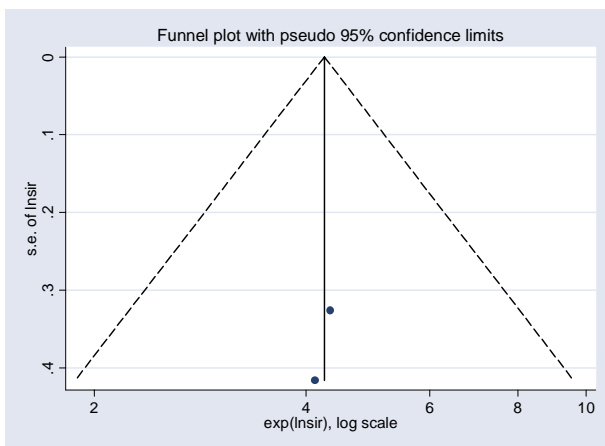

## Pancreas

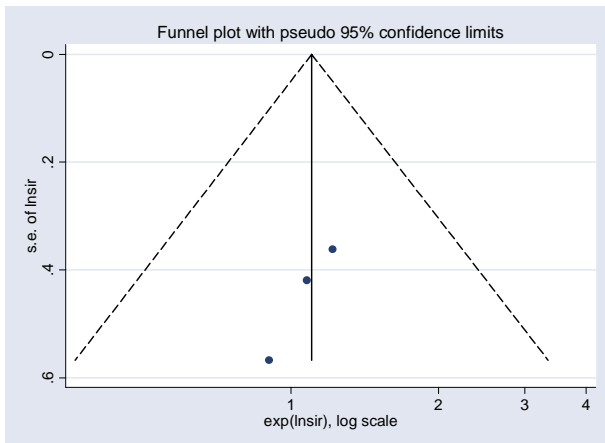

## Larynx

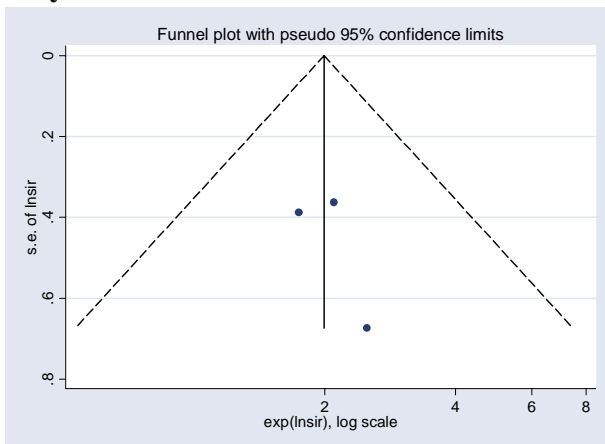

## Trachea, bronchus, and lung

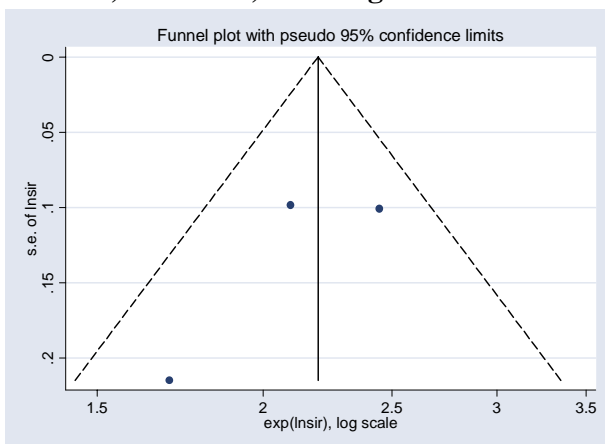

## Melanoma

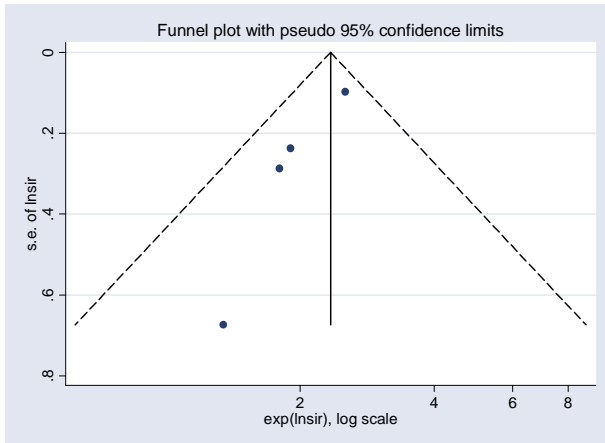

## Non-melanoma—skin (Finland/Denmark)

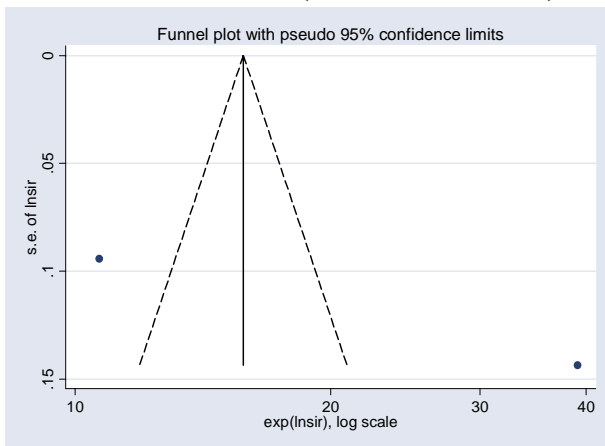

## Non-melanoma—skin (any measure)

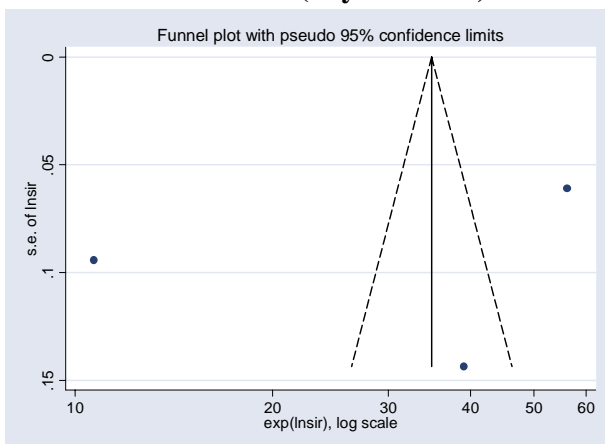

## Mesothelioma

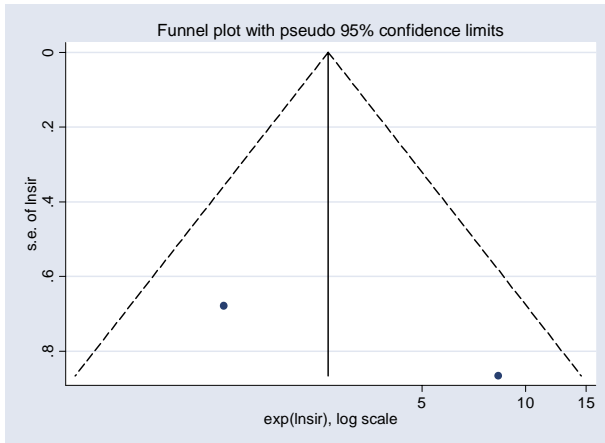

## Connective and other soft tissue

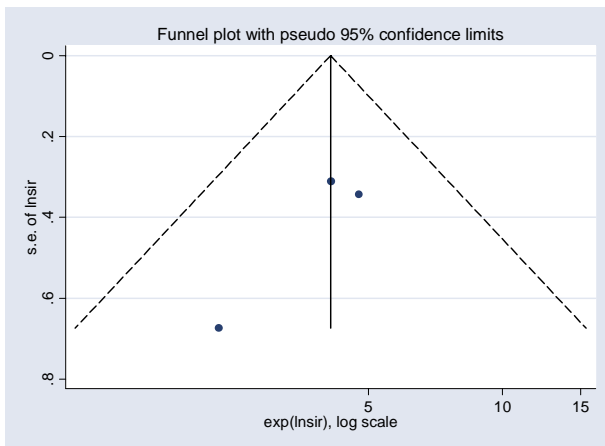

## Breast

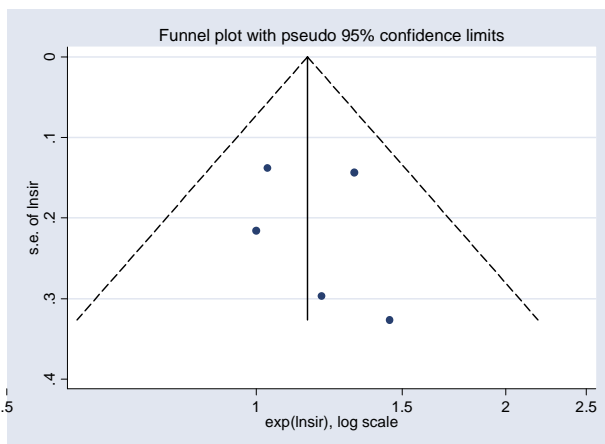

## Vulva

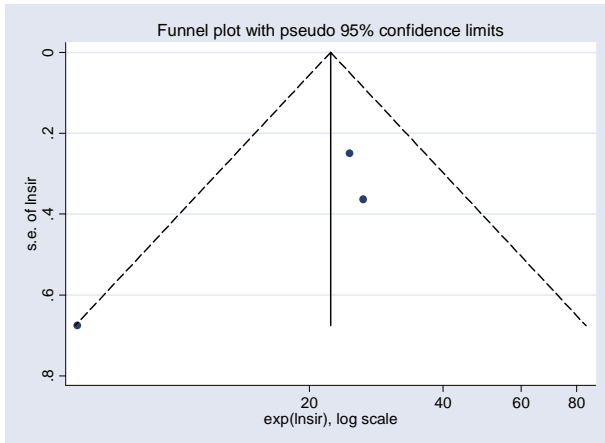

## Vagina

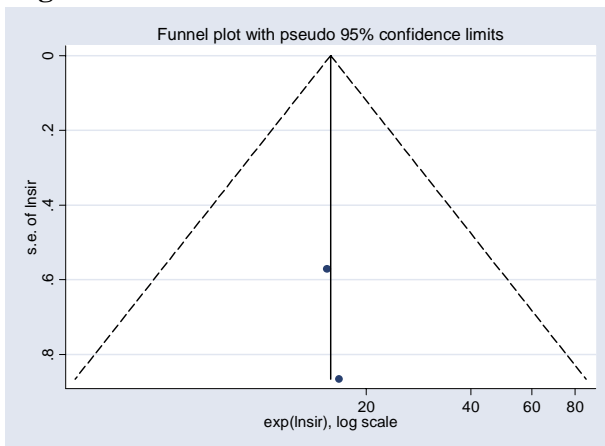

## Vulva/vagina

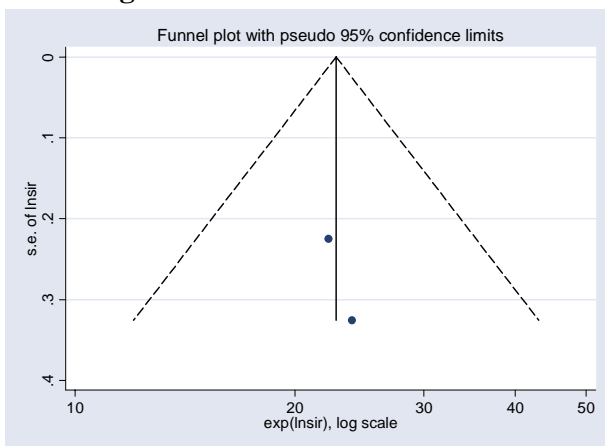

### Cervix uteri

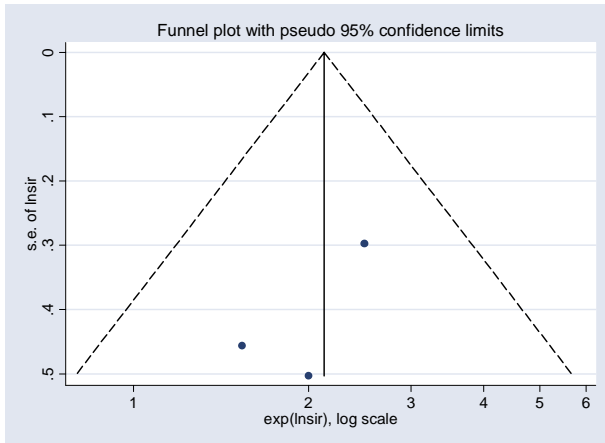

### Corpus uteri

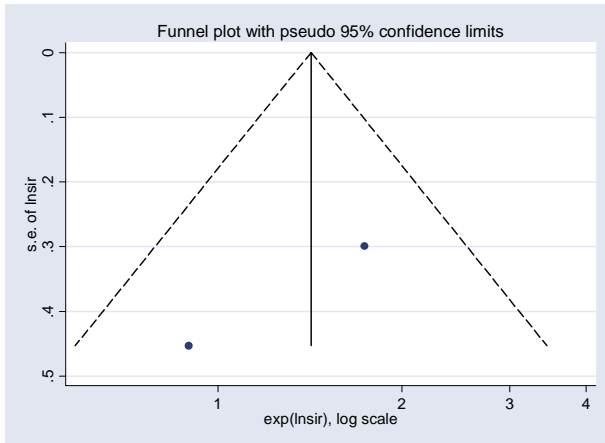

### Ovary

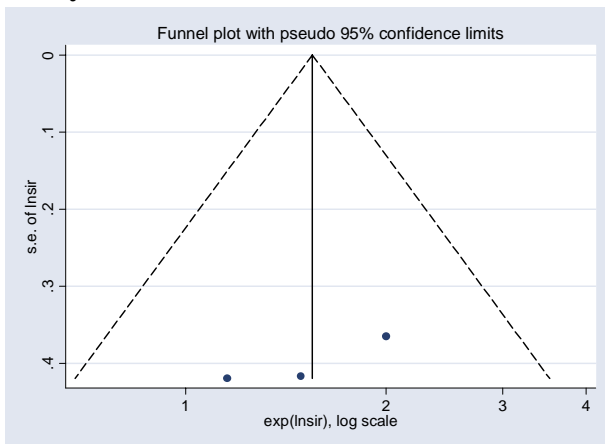



## Prostate

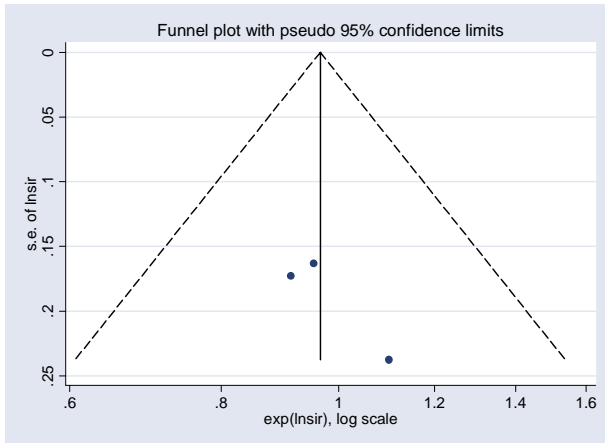

## Testis

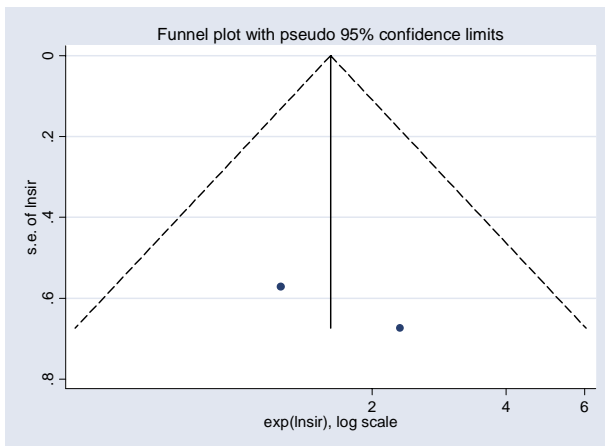

## Eye

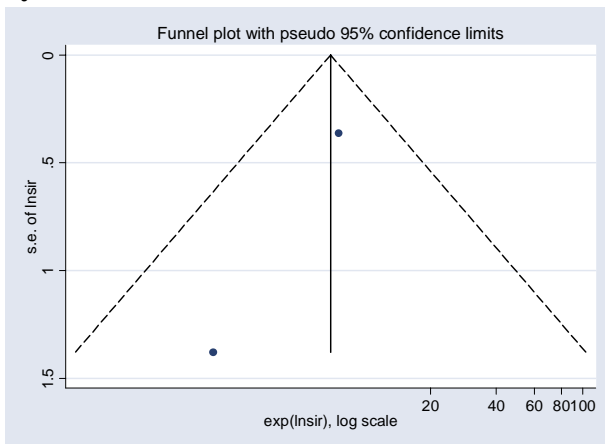

## Brain

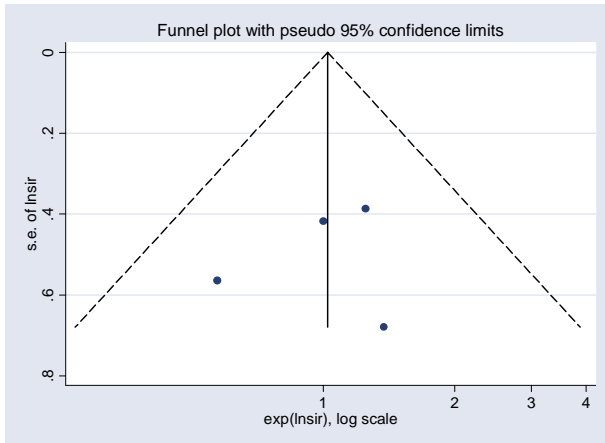

## Thyroid

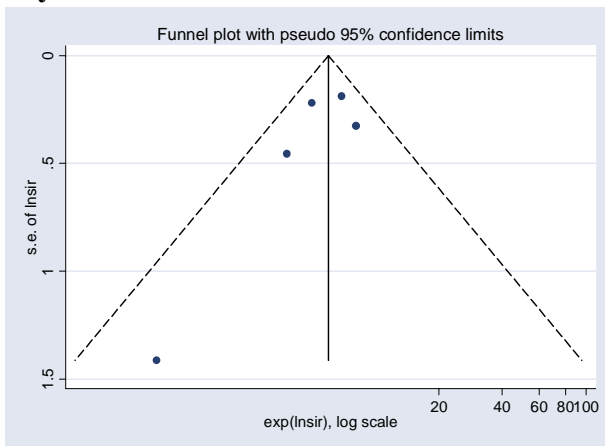

## Hodgkin's lymphoma

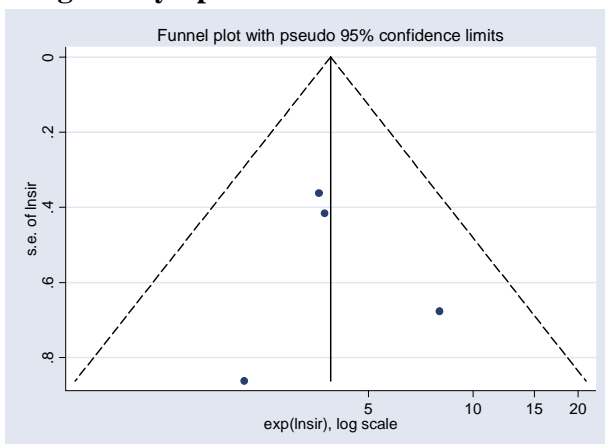

## Non-Hodgkin's lymphoma

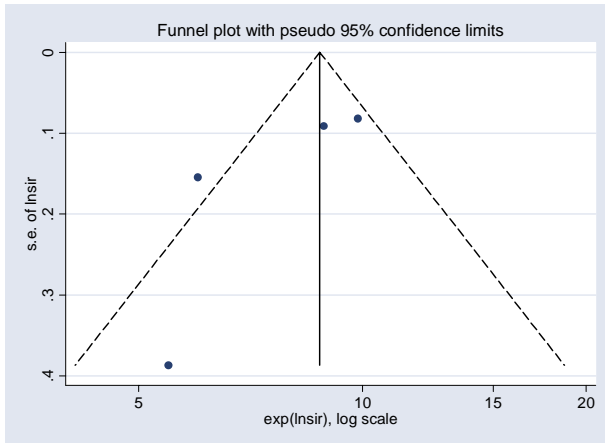

## Leukaemia

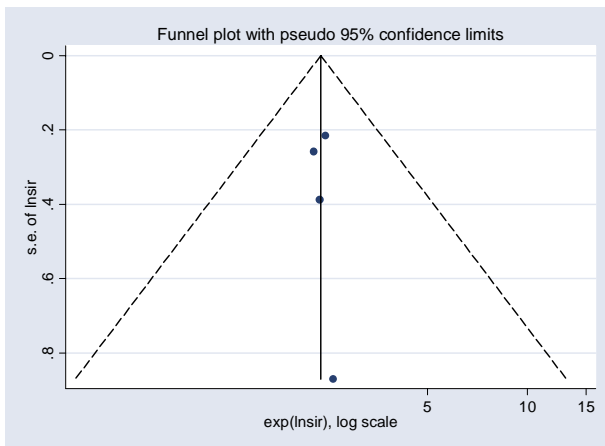

## Kidney

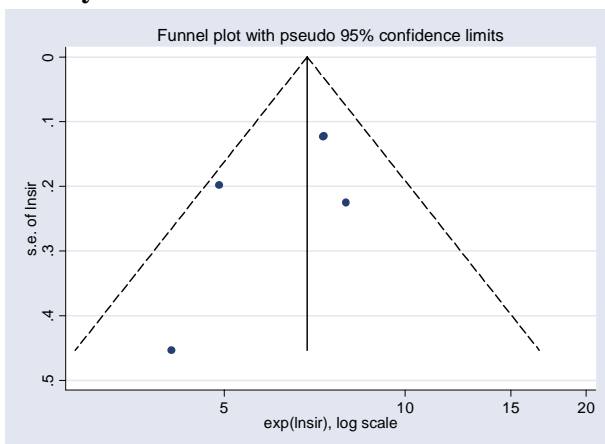

## Bladder

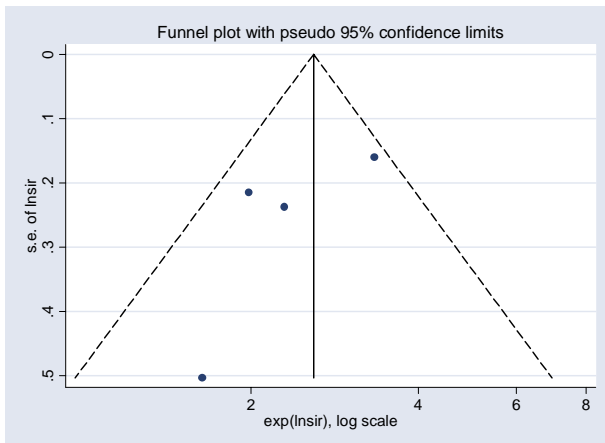

## Multiple myeloma

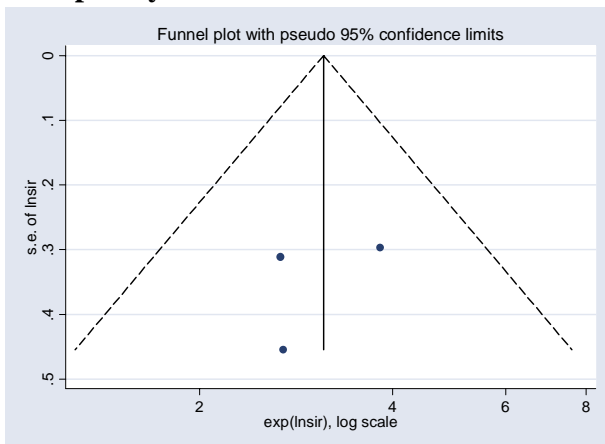

| Site name                     | Transplant meta-analysis |               | HIV/AIDS meta-analysis |               |
|-------------------------------|--------------------------|---------------|------------------------|---------------|
|                               | # studies                | Egger p-value | # studies              | Egger p-value |
| Non-AIDS-defining cancers     |                          |               |                        |               |
| Lip                           | 5                        | 0.68          | 2                      | -             |
| Oral cavity and pharynx       | 3                        | 0.51          | 4                      | 0.16          |
| Oesophagus                    | 3                        | 0.44          | 4                      | 0.64          |
| Stomach                       | 3                        | 0.18          | 7                      | 0.21          |
| Small intestine               | 3                        | 0.29          | 4                      | 0.11          |
| Colon                         | 3                        | 0.46          | 2                      | -             |
| Rectum                        | 2                        | -             | 2                      | -             |
| Colon and rectum              | 3                        | 0.89          | 5                      | 0.92          |
| Anus                          | 2                        | -             | 6                      | 0.71          |
| Liver                         | 3                        | 0.12          | 7                      | 0.36          |
| Pancreas                      | 3                        | 0.10          | 6                      | 0.18          |
| Larynx                        | 3                        | 0.56          | 5                      | <b>0.02</b>   |
| Trachea, bronchus, and lung   | 3                        | 0.48          | 7                      | <b>0.05</b>   |
| Melanoma                      | 4                        | <b>0.04</b>   | 6                      | 0.06          |
| Non-melanoma skin             | 3                        | 0.68          | 4                      | 0.22          |
| Breast                        | 5                        | 0.70          | 6                      | 0.43          |
| Vulva and vagina              | 2                        | -             | 2                      | -             |
| Uterus                        | 2                        | -             | 2                      | -             |
| Ovary                         | 3                        | 0.26          | 5                      | 1.00          |
| Penis                         | 1                        | -             | 3                      | 0.62          |
| Prostate                      | 3                        | 0.28          | 6                      | 0.35          |
| Testis                        | 2                        | -             | 7                      | <b>0.05</b>   |
| Kidney                        | 5                        | 0.27          | 6                      | 0.26          |
| Bladder                       | 4                        | 0.27          | 5                      | 0.42          |
| Eye                           | 2                        | -             | 2                      | -             |
| Brain                         | 4                        | 0.73          | 7                      | 0.15          |
| Thyroid                       | 5                        | 0.24          | 5                      | 0.95          |
| Hodgkin's lymphoma            | 4                        | 0.88          | 7                      | 0.73          |
| Multiple myeloma              | 3                        | 0.68          | 6                      | 0.12          |
| Leukaemia                     | 4                        | 0.83          | 7                      | 0.33          |
| All non-AIDS defining cancers | 5                        | 0.87          | 7                      | 0.17          |
| Aids defining cancers         |                          |               |                        |               |
| Kaposi's sarcoma              | 1                        | -             | 1                      | -             |
| Cervix uteri                  | 3                        | 0.39          | 6                      | 0.78          |
| Non-Hodgkin's lymphoma        | 4                        | 0.21          | 6                      | 0.91          |
